1 **Means, motive, and opportunity for biological invasions: genetic**  
2 **introgression in a fungal pathogen**

3

4

5 FLÁVIA ROGÉRIO,<sup>1,2</sup> COCK VAN OOSTERHOUT,<sup>3</sup> MAISA CIAMPI-  
6 GUILLARDI,<sup>1</sup> FERNANDO HENRIQUE CORRER,<sup>4</sup> GUILHERME KENICHI  
7 HOSAKA,<sup>4</sup> SANDRINE CROS-ARTEIL,<sup>5</sup> GABRIEL RODRIGUES ALVES  
8 MARGARIDO,<sup>4</sup> NELSON S. MASSOLA JÚNIOR,<sup>1</sup> and PIERRE GLADIEUX<sup>5</sup>

9

10 <sup>1</sup>Department of Plant Pathology and Nematology, University of São Paulo (USP), Luiz  
11 de Queiroz College of Agriculture (ESALQ), Piracicaba, SP, Brazil, <sup>2</sup>Institute for  
12 Agribiotechnology Research (CIALE), University of Salamanca, Salamanca, Spain,  
13 <sup>3</sup>School of Environmental Sciences, University of East Anglia, Norwich Research Park,  
14 Norwich NR4 7TJ, UK, <sup>4</sup>Department of Genetics, University of São Paulo, Luiz de  
15 Queiroz College of Agriculture (ESALQ), Piracicaba, SP, Brazil, <sup>5</sup>UMR PHIM,  
16 University of Montpellier, INRAE, CIRAD, Montpellier SupAgro, Montpellier, France

17

18 correspondence

19 Flávia Rogério

20 E-mail: [flavia.rogerio@usal.es](mailto:flavia.rogerio@usal.es)

21

22

23 **ABSTRACT**

24 Invasions by fungal plant pathogens pose a significant threat to the health of agriculture  
25 ecosystems. Despite limited standing genetic variation, many invasive fungal species can  
26 adapt and spread rapidly, resulting in significant losses in crop yields. Here, we report on  
27 the population genomics of *Colletotrichum truncatum*, a polyphagous pathogen that can  
28 infect more than 460 plant species, and an invasive pathogen on soybean in Brazil. We  
29 study the whole-genome sequences of 18 isolates representing 10 fields from two major  
30 regions of soybean production. We show that Brazilian *C. truncatum* is subdivided into  
31 three phylogenetically distinct lineages that exchange genetic variation through  
32 hybridization. Introgression affects 2 to 30% of the nucleotides of genomes and varies  
33 widely between the lineages. We find that introgressed regions comprise secreted

34 protein-encoding genes, suggesting possible co-evolutionary targets for selection in those  
35 regions. We highlight the inherent vulnerability of genetically uniform crops in the agro-  
36 ecological environment, particularly when faced with pathogens that can take full  
37 advantage of the opportunities offered by an increasingly globalized world. Finally, we  
38 discuss “The Means, Motive, and Opportunity” of fungal pathogens and how they can  
39 become invasive species of crops. We call for more population genomic studies because  
40 such analyses can help identify geographic areas and pathogens that pose a risk, thereby  
41 helping to inform control strategies to better protect crops in the future.

42

#### 43 **KEYWORDS**

44 soybean, anthracnose, *Colletotrichum truncatum*, population genomics, recombination,  
45 bridgehead

46

47

#### 48 **INTRODUCTION**

49 Understanding the eco-evolutionary and human-associated factors underlying  
50 the emergence and spread of fungal plant diseases is essential to the  
51 implementation of effective control measures (Hessenauer et al., 2020;  
52 Stukenbrock & McDonald, 2008). Population genetics and molecular  
53 epidemiology can shed light on both the extrinsic and intrinsic drivers of biological  
54 invasions by fungal plant pathogens (Gladieux et al., 2015; Grünwald, McDonald,  
55 & Milgroom, 2016). In parallel, molecular ecology and evolution can provide  
56 insights into how an invasive species with limited genetic variation can evolve into  
57 ecologically successful pest species soon after a founder event.

58 Fungi can rapidly evolve into devastating invasive species, despite their often  
59 low genetic diversity (Ali et al., 2014; De Jonge et al., 2013; Gladieux et al., 2018;  
60 Latorre et al., 2020; Stauber, Badet, Prospero, & Croll, 2020). Although this is a  
61 characteristic that they share with many other invasive species, some unique  
62 aspects of fungal population biology may facilitate rapid evolutionary changes and  
63 enhance their invasive potential. Despite regular demographic bottlenecks (e.g.,  
64 during winters), fungal populations generally have periods of huge census size,  
65 which can substantial evolutionary changes (Gladieux et al., 2015).

66 Fungal reproduction is complex and can include both sexual and asexual stages  
67 (Alexopoulos, Mims, & Blackwell, 1996). Asexual reproduction can be  
68 accomplished through mitotic spores (conidia), which augments the propagule  
69 pressure during invasion in non-native habitats. In addition, fungi produce hyphae  
70 which are thread-like (filamentous) structures, and this gives fungi a second mode  
71 of asexual reproduction, i.e., through mycelial fragmentation. Complementing  
72 these asexual modes, during sexual reproduction, compatible individuals may  
73 exchange genetic information during plasmogamy and karyogamy between  
74 gametes (Alexopoulos et al., 1996). Meiotic spores promote the creation of novel  
75 genotypes through recombination, and they serve as dispersal and survival  
76 structures (Taylor, Jacobson, & Fisher, 1999). If compatible gametes are derived  
77 from genetically diverged lineages, the resulting genetic exchange can lead to  
78 genetic introgression.

79 The large census size of invasive fungal populations enables rapid adaptations  
80 to new varieties of resistant plants or antifungals molecules (Barton, 2010;  
81 Gladieux et al., 2015). This may be particularly important for fungal populations  
82 found on major widespread crops, which due to their vast population sizes, benefit

83 from a high input of novel variation by mutations. These new pathogen genotypes  
84 can rapidly spread through genetically uniform host populations. In other words,  
85 the high evolvability of some fungi during biological invasions is not necessarily  
86 realized through their high standing genetic variation at the point of entry (cf.  
87 Fisher's Fundamental Theorem (Price, 1972)). Rather, many fungi are highly  
88 potent biological invaders due to input of *de novo* allelic and genotypic variation  
89 every generation, which is a consequence of their high potential for gene flow,  
90 recombination and mutation. These drivers of genetic variation play a crucial role  
91 in the co-evolutionary arms race between fungal pathogens and their hosts. A  
92 sudden increase in these drivers can shift the co-evolutionary balance, and these  
93 effects can be particularly severe in an eco-agriculture setting with genetically  
94 relatively uniform host plants and animals (Van Oosterhout, 2021).

95 Multiple populations of the same fungal species can coexist on one host whilst  
96 competing for limited resources (Bueno-Sancho et al., 2017; Fournier, Gladieux,  
97 & Giraud, 2013; Hartmann, McDonald, & Croll, 2018; Hubbard et al., 2015;  
98 Persoons et al., 2017; Silva, Várzea, Paulo, & Batista, 2018; Stauber et al., 2020;  
99 Thierry et al., 2020; Vieira, Silva, Várzea, Paulo, & Batista, 2018). In the absence  
100 of temporal, spatial or habitat barriers, coexistence on the same host may foster  
101 genetic exchanges between fungal lineages. If coexisting populations represent  
102 previously geographically isolated lineages that have not evolved strong pre- or  
103 postzygotic barriers, such introgression can rapidly generate novel genotypic  
104 variation. In turn, this can increase the amount of phenotype variation – a  
105 phenomenon known as transgressive segregation – which provides more novel  
106 substrate for natural selection (Nichols et al., 2015).

107       Admixture between multiple coexisting populations can also lead to a so-  
108       called bridgehead effect, in which highly adapted lineages emerge through  
109       recombination among propagules established in an area of first introduction  
110       (Bertelsmeier & Keller, 2018; Dutech et al., 2012; Stauber et al., 2020). Ongoing  
111       fungal invasions offer a unique opportunity to learn about the ecology and  
112       evolution of biotic interactions in human-altered ecosystems (Gladieux et al., 2014;  
113       Parker & Gilbert, 2018; Thrall, Hochberg, Burdon, & Bever, 2007; Thrall et al.,  
114       2011), and such studies are important to assess the risks posed by pathogens to crop  
115       in agriculture.

116       Anthracnose, mainly associated with the fungus *Colletotrichum truncatum*  
117       (Hyde et al., 2009), is one of the most prominent foliar diseases of soybean. This  
118       ascomycete is seed-transmitted and can infect more than 460 plant species,  
119       including important crops in the Fabaceae and Solanaceae families (Cannon,  
120       Damm, Johnston, & Weir, 2012; Damm, Woudenberg, Cannon, & Crous, 2009;  
121       Weidemann, TeBeest, & Cartwright, 1988). In Brazil, the worldwide leader in  
122       soybean production, previous population genetic studies showed that *C. truncatum*  
123       is a recently introduced invasive species structured into three highly divergent  
124       clusters coexisting in soybean fields. This suggests there have been multiple  
125       introductions from distinct source populations, which are yet to be identified  
126       (Rogério, Gladieux, Massola, & Ciampi-Guillardi, 2019).

127       Here, we use whole-genome resequencing and a population genomics  
128       approach to characterize the genetic makeup and infer the evolutionary history of  
129       *C. truncatum* causing soybean anthracnose in Brazil. We document evidence of  
130       extensive introgression between the three lineages that have invaded Brazilian  
131       soybean. Our study highlights the risk that Brazilian *C. truncatum* may represent

132 as a bridgehead for future invasions of soybean-producing areas, facilitating  
133 admixture between the three lineages (as well as with any unsampled lineages and  
134 possible future immigrant lineages). We discuss why fungi have the means to  
135 become potent biological invaders of crops, arguing this is due to their ability to  
136 rapidly generate novel genetic variation, in combination with their high propagule  
137 pressure accomplished through two models of asexual reproduction. We  
138 furthermore discuss why the large biomass of relative uniform crops provides the  
139 motive, and the bridgehead populations that enable genetic introgression the  
140 opportunity for such biological invasions.

141

## 142 **MATERIALS AND METHODS**

### 143 **Fungal isolates, DNA extraction and genome sequencing**

144 We used 18 isolates of *Colletotrichum truncatum* from naturally infected  
145 commercial soybean fields from Mato Grosso (MT) and Goiás (GO) states in Brazil.  
146 Isolates were randomly selected from the three genetic clusters (C1, C2, and C3)  
147 previously identified based on the population genetics analysis of microsatellite variation  
148 (Rogério, Gladieux, Massola, & Ciampi-Guillardi, 2019) (Table 1). Fungal genomic  
149 DNA was extracted using Wizard Genomic DNA Purification kit (Promega) from fresh  
150 mycelium grown on potato dextrose liquid medium (Difco). Paired-end libraries were  
151 prepared and sequenced on Illumina HiSeq2000 (2x150 bp, insert size ~ 500 pb) by  
152 Genewiz (South Plainfield, USA). The raw reads were deposited at the NCBI/Genbank  
153 under the Sequence Read Archive (SRA) accession numbers SAMN13196067 to  
154 SAMN13196084 (Table S1).

155

156

157 **Table 1.** *Colletotrichum truncatum* isolates used in this study

| Cluster | Isolate | State       | Geographical coordinates     | Cultivar    | Sampling year |
|---------|---------|-------------|------------------------------|-------------|---------------|
| C1      | LFN0169 | Mato Grosso | 13°18946.799S-56°02933.499W  | Y-70 Pioner | 2016          |
| C1      | LFN0185 | Mato Grosso | 13°24939.499S- 56°04904.099W | 7709 Nidera | 2017          |
| C1      | LFN0262 | Mato Grosso | 11°58958.599S- 55°30928.699W | 7709 Nidera | 2017          |
| C1      | LFN0309 | Goiás       | 17°27936.299S- 51°07910.399W | 7739 Monsoy | 2017          |
| C1      | LFN0360 | Goiás       | 17°45951.599S- 51°02906.999W | PP7200Macro | 2017          |
| C1      | LFN0297 | Goiás       | 17°24943.199S- 50°57929.099W | Nidera 5909 | 2017          |
| C1      | LFN0346 | Goiás       | 17°45951.599S- 51°02906.999W | Nidera 5909 | 2017          |
| C2      | LFN0205 | Mato Grosso | 13°24939.499S- 56°04904.099W | 8372 Nidera | 2017          |
| C2      | LFN0217 | Mato Grosso | 11°55922.899S- 55°37900.099W | 7709 Nidera | 2017          |
| C2      | LFN0248 | Mato Grosso | 11°58958.599S- 55°30928.699W | 7709 Nidera | 2017          |
| C2      | LFN0318 | Goiás       | 17°27936.299S- 51°07910.399W | PP7200Macro | 2017          |
| C2      | LFN0349 | Goiás       | 17°45951.599S- 51°02906.999W | Nidera 5909 | 2017          |
| C2      | LFN0288 | Goiás       | 17°24943.199S- 50°57929.099W | 7739 Monsoy | 2017          |
| C3      | LFN0150 | Mato Grosso | 13°10910.199S- 56°04908.099W | 8766 Monsoy | 2017          |
| C3      | LFN0225 | Mato Grosso | 11°55922.899S- 55°37900.099W | 8372 Nidera | 2017          |
| C3      | LFN0268 | Mato Grosso | 11°58958.599S- 55°30928.699W | 7709 Nidera | 2017          |
| C3      | LFN0291 | Goiás       | 17°24943.199S- 50°57929.099W | PP7200Macro | 2017          |
| C3      | LFN0308 | Goiás       | 17°27936.299S- 51°07910.399W | Nidera 5909 | 2017          |

158

159

## 160 **Read mapping and SNP calling**

161 Read quality was checked using FASTQC  
 162 (<https://www.bioinformatics.babraham.ac.uk/projects/fastqc/>). Raw Illumina reads were  
 163 trimmed for adapter contamination and bases with an average Phred score smaller than  
 164 30 were removed using CUTADAPT v1.16 software (M. Martin, 2011). Reads were  
 165 mapped against the reference genome of the previously assembled isolate CMES1059  
 166 (Rogério et al., 2020) using BWA-MEM v0.7.15 (options -n=5) (Li & Durbin, 2009).  
 167 Alignments were sorted with SAMTOOLS v1.3 (Li et al., 2009), and reads with mapping  
 168 quality below 30 were removed. Duplicates were removed using PICARD v2.7  
 169 (<http://broadinstitute.github.io/picard/>). Single nucleotide polymorphisms (SNPs) and  
 170 indels were called using the HAPLOTYPECALLER module from the Genome Analysis

171 Toolkit v4.0.12 (GATK) (McKenna et al., 2010), with the option *–emitRefConfidence*  
172 GVCF. The gVCF files listing variants were merged using COMBINEGVCFs and  
173 genotyped using GENOTYPEGVCFs. Monomorphic sites were included using the  
174 argument *include\_nonvariantsites*. High confidence SNPs were identified using GATK’s  
175 VARIANTFILTRATION module, following GATK’s best practices  
176 ([http://www.broadinstitute.org/gatk/guide/best\\_practices](http://www.broadinstitute.org/gatk/guide/best_practices)), with parameters: QD < 2.0  
177 (Variant Quality), FS > 60.0 (Phred score Fisher’s test), MQ < 40.0 (Mapping Quality),  
178 MQRankSum < 12.5 (Mapping Quality of Reference reads vs alternative reads) and  
179 ReadPosRankSum < 8.0 (Distance of alternative read from the end of the reads).

180

## 181 **Population structure**

182 We used SPLITSTREE v4 (Huson & Bryant, 2006) to visualize relationships  
183 between isolates in a phylogenetic network based on pseudoassembled genomic  
184 sequences generated from the tables of SNPs with the reference sequence as a template.  
185 We also used the pairwise homoplasy index (PHI) test implemented in SPLITSTREE to test  
186 the null hypothesis of clonality; recombination is expected to result in exchangeable sites  
187 within lineages.

188 Population structure was analyzed using methods optimized for the analysis of  
189 large datasets and which do not assume Hardy-Weinberg equilibrium. We performed  
190 principal components (PCA) and discriminant analysis of principal components (DAPC)  
191 in R with the package ADEGENET v2.0 (Jombart & Ahmed, 2011), using the  
192 FIND.CLUSTERS function. DAPC is a non-model-based method using PCA as a prior step,  
193 which provides a description of clusters using discriminant functions. We retained the  
194 first 20 principal components. DAPC identifies an optimal number of genetic clusters  
195 that best describes the data by running a k-means clustering algorithm and comparing the



196 different clustering solutions using the Bayesian Information Criterion (BIC). Population  
197 structure was also analyzed using the software sNMF (Frichot, Mathieu, Trouillon,  
198 Bouchard, & François, 2014) which estimates ancestry coefficients based on sparse non-  
199 negative matrix factorization and least squares optimization. We calculated ancestry  
200 coefficients for 2 to 10 ancestral populations ( $K$ ) using 100 replicates for each  $K$ . The  
201 preferred number of  $K$  was chosen using a cross-entropy criterion based on the prediction  
202 of masked haplotypes to evaluate the error of ancestry estimation. All clustering analyses  
203 were based on biallelic SNPs without missing data.

204

### 205 **Diversity and divergence**

206 Polymorphism and divergence statistics were computed in 100 kb non-  
207 overlapping windows using the SCIKIT-ALLEL v1.0.2 Python package (Miles & Harding,  
208 2017). Summary statistics were plotted for the 10 the largest contig using CIRCOS v0.67  
209 software (Connors et al., 2009).

210

### 211 **Recombination analyses**

212 Recombination events were analyzed using the software RDP4 (Martin, Murrell,  
213 Golden, Khoosal, & Muhire, 2015) implementing seven independent detection  
214 algorithms: RDP (Martin & Rybicki, 2000), GENECONV (Padidam, Sawyer, & Fauquet,  
215 1999), BOOTSCAN (Martin, Posada, Crandall, & Williamson, 2005), MAXCHI (Smith,  
216 1992) CHIMAERA (Posada & Crandall, 2002), SiSCAN (Gibbs, Armstrong, & Gibbs,  
217 2000) and 3SEQ (Boni, Posada, & Feldman, 2007). Whole sequences of the ten largest  
218 contigs were scanned using the default settings for the window size. Tests were  
219 conducted using a critical value  $\alpha = 0.05$  and p-values were Bonferroni corrected for  
220 multiple comparisons of sequences. The evidence for a recombination signal was

221 considered to be strong if it was found to be significant with three or more detection  
222 methods. Only events for which the software identified the parental sequences (i.e., no  
223 ‘unknowns’) without ambiguous start and end position of the recombination block were  
224 considered.

225 We used POPLDDECAY version v3.4 (Zhang, Dong, Xu, He, & Yang, 2019) to  
226 investigate the patterns of linkage disequilibrium decay within *C. truncatum* genetic  
227 groups as coefficient of linkage disequilibrium ( $r^2$ ) (Hill & Robertson, 1968) calculated  
228 for all pairs of SNPs less than 300 kb apart. For this, we used biallelic SNPs, excluding  
229 missing data and sites with minor allele frequencies below 10%.

230

### 231 **Genome scan for signature of genetic exchanges**

232 We used CHROMOPAINTER v0.0.4 (Lawson, Hellenthal, Myers, & Falush, 2012)  
233 for probabilistic chromosome painting to infer recent shared ancestry between *C.*  
234 *truncatum* lineages. This method “paints” individuals in “recipient” populations as a  
235 combination of segments from “donor” populations, using linkage disequilibrium  
236 information for probability computation and assuming that linked alleles are more likely  
237 to be exchanged together during recombination events. We ran three separate analyses,  
238 each considering one particular *C. truncatum* lineage as a collection of haplotypes to be  
239 painted, and all lineages as donors. The recombination scaling constant  $N_e$  and emission  
240 probabilities ( $\mu$ ) were calculated as averages weighted by contigs’ length determined by  
241 LDHAT (Auton & McVean, 2007). Estimates of these parameters for each lineage were  
242 obtained by running the expectation maximization algorithm with 200 iterations. These  
243 analyses were based on biallelic SNPs dataset without missing data.

244 Fine-scale admixture between *C. truncatum* lineages also was analyzed using  
245 the software HYBRIDCHECK (Ward & van Oosterhout, 2016), which uses a sliding

246 window to scan for sudden changes in nucleotide divergence between sequences, thus  
247 identifying potential genetic exchanges where nucleotide divergence is significantly  
248 lower. The similarities were visualized through a plot employing the primary colors red,  
249 green, and blue, using the 100 bp windows based on the proportion of SNPs shared  
250 between the pairwise sequences, with a stepwise increment of 1 bp. In cases where all  
251 SNPs are shared between just two of the three lineages, the hybrid color is an exact 50%  
252 mix of two primary colors. Hence, yellow, purple, and turquoise colors pinpoint regions  
253 of possible recent genetic exchange between two sequences. We carried out this analysis  
254 on a triplet involving one isolate representative of each lineage: isolates LFN0297  
255 (lineage C1), LFN0318 (lineage C2), and LFN0308 (lineage C3) for the ten largest  
256 contigs.

257         HYBRIDCHECK and CHROMOPAINTER identify genomic regions of shared  
258 ancestry, and such signal can be caused either by genetic introgression, or by incomplete  
259 lineage sorting (Durand, Patterson, Reich, & Slatkin, 2011). In order to differentiate  
260 between genetic introgression and incomplete lineage sorting, we also used  
261 HYBRIDCHECK to estimate the age of recombinant regions. If the genomic region  
262 coalescence before the split of the species (or lineages), the signal is consistent with  
263 incomplete lineage sorting. However, if the coalescence event is dated after the speciation  
264 event (or after the bifurcation of the lineages in the tree), the genetic exchange has  
265 occurred after the divergence. In the latter case, the signal is consistent with genetic  
266 introgression after hybridization (Jouet, McMullan, & Van Oosterhout, 2015).  
267 Recombination blocks were then dated assuming a strict molecular clock with a mutation  
268 rate of  $10^{-8}$  per generation, assuming a generation time of one year.

269

270 **Functional enrichment**

271 To characterize genes present in the introgressed regions between *C. truncatum*  
272 lineages, we extracted the transcripts and proteins from the corresponding regions in the  
273 reference genome (Rogério et al., 2020) using GFFREAD (Pertea & Pertea, 2020). We  
274 used SIGNALP v5.0 (Armenteros et al., 2019) to identify secreted proteins. GO terms  
275 were assigned from re-annotated transcripts using BLAST2GO (Conesa et al., 2005)  
276 against the NCBI non-redundant database and used in the enrichment analysis.

277

### 278 **Demographic inferences**

279 To infer the evolutionary history of the genetic lineages we used the Python  
280 package DADI (Gutenkunst, Hernandez, Williamson, & Bustamante, 2009). The method  
281 implemented in DADI infers demographic parameters based on a diffusion approximation  
282 to the site frequency spectrum (SFS). The Python script EASYSFS.PY (available at  
283 <https://github.com/isaacovercast/easySFS>) was used to convert the VCF file into a three-  
284 dimensional joint site frequency spectrum (3D-JSFS). The SFS was folded because no  
285 appropriate outgroup was available. We compared twelve demographic models including  
286 strict isolation, isolation with migration (asymmetrical migration rates), and isolation  
287 with population size changes, with four possible topologies, using the demographic  
288 modeling workflow (*dadi\_pipeline*) from Portik et al. 2017 (Fig. S1). For each model,  
289 we performed four rounds of optimizations; for each round, we ran multiple replicates  
290 and used parameter estimates from the best scoring replicate (highest log-likelihood) to  
291 seed searches in the following round. We used the default settings in *dadi\_pipeline* for  
292 each round (replicates = 10, 20, 30, 40; maxiter = 3, 5, 10, 15; fold = 3, 2, 2, 1), and  
293 optimized parameters using the Nelder-Mead method (*optimize\_log\_fmin*). We used the  
294 optimized parameter sets of each replicate to simulate the 3D-JSFS, and the multinomial  
295 approach was used to estimate the log-likelihood of the given the model. We assessed

296 the model's goodness-of-fit by maximizing the model likelihood and visual inspection of  
297 the residuals between the site frequency spectra generated by the inferred model and the  
298 real data.

299

## 300 **RESULTS**

### 301 **Population structure and levels of genetic variation**

302 Read mapping and variant calling for 18 isolates of *C. truncatum* submitted to  
303 whole-genome sequencing identified 2,220,191 biallelic Single Nucleotide  
304 Polymorphisms (SNPs), distributed across 128 contigs (see Table S1 to  
305 sequencing statistics). To assess population subdivision and to visualize relationships  
306 among isolates we built a neighbor-net network with SPLITSTREE based on the full set of  
307 SNPs. This phylogenetic network revealed three groups, henceforth referred to as  
308 "lineages" C1, C2 and C3 (Fig. 1A). Lineage C1 was connected to the rest of the dataset  
309 by a long, non-reticulated branch consistent with relatively long-term genetic isolation.  
310 Lineage 2 and 3 were connected by branches showing extensive reticulations (looping in  
311 the network) indicating a history of recombination or incomplete lineage sorting (Fig.  
312 1A). In a Discriminant Analysis of Principal Component (DAPC) modelling  $K=2$  to  
313  $K=10$  populations, the Bayesian Information Criterion monotonously decreased with  
314 increasing  $K$ , preventing clear choice of a best supported model, but the composition of  
315 clusters identified at  $K=3$  matched what was observed in the neighbor-net network (Fig.  
316 1B and Fig. S2). Likewise clustering by sparse non-negative matrix factorization  
317 algorithms, as implemented in the sNMF method, identified  $K = 3$  as the best supported  
318 model based on cross-entropy. The ancestry coefficients estimated with sNMF revealed  
319 essentially the same pattern of population subdivision as the DAPC and neighbor-net

320 network. However, three isolates (LFN0318, LFN0217, and LFN0150) shared ancestry  
 321 in two clusters, suggesting admixture between lineages (Fig.1C and Fig.S2).

322

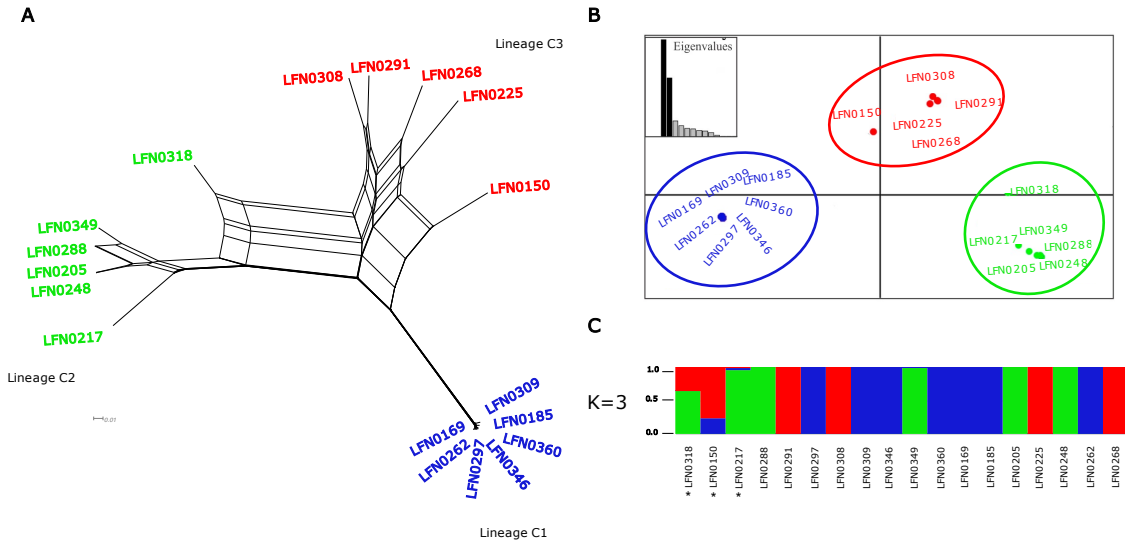

323

324

325 **Figure 1.** Population subdivision of *Colletotrichum truncatum*. (A) Neighbor-Net  
 326 networks showing relationships between isolates identified on the basis of the full set of  
 327 SNPs without missing data. The groups revealed are referred to as lineage C1, C2, and  
 328 C3. (B) Scatterplot from discriminant analysis of principal components (DAPC). (C)  
 329 Individual ancestry coefficients estimated using sNMF. Each isolate is represented by a  
 330 thick vertical line in the most probably number of groups (K=3), and bar colors represent  
 331 each lineage. Asterisks indicate admixture isolates.

332

333 Nucleotide diversity was nearly twice as high in C3 than in C2, and it was more  
 334 than one order of magnitude higher in C2 than in C1 (C3:  $\pi=0.0113/\text{bp}$ ; C2:  $\pi=0.0062/\text{bp}$ ;  
 335 C1:  $\pi=0.0002/\text{bp}$ ; Table 2; Fig.2). In lineage C2, regions of relatively high nucleotide  
 336 diversity were interspersed with tracts of low diversity (Fig. S3). Tajima's D values were  
 337 either close to zero, or they were negative in the three lineages (C1:  $D=0.008$ ; C2:  $D=-$   
 338  $0.380$ ; C3:  $D=-0.177$ ; Table 2); a negative value is consistent with population expansion  
 339 after a recent bottleneck or founder event. Absolute divergence ( $d_{xy}$ ) among lineages was

340 similar between the three pairs of lineages ( $d_{xy}=0.018/\text{bp}$  between C1 and C2,  $0.018/\text{bp}$   
 341 between C2 and C3, and  $0.015/\text{bp}$  between C1 and C3; Fig. 2).

342

343 **Table 2.** Summary of genomic diversity within *Colletotrichum truncatum* lineages in  
 344 nonoverlapping 100kb windows

| Lineage | N <sup>a</sup> | $\pi^b$           | D <sup>c</sup> |
|---------|----------------|-------------------|----------------|
| C1      | 7              | 0.0002 (0.0003) * | 0.008 (1.006)  |
| C2      | 6              | 0.0062 (0.0041)   | -0.380 (0.858) |
| C3      | 5              | 0.0113 (0.0056)   | -1.177 (0.528) |

345

<sup>a</sup> Sample size

346

<sup>b</sup> Nucleotide diversity per base pair, for all contigs larger than 100kb

347

<sup>c</sup> Tajima's neutrality statistic, for all contigs larger than 100kb

348

\* Standard deviation

349

350

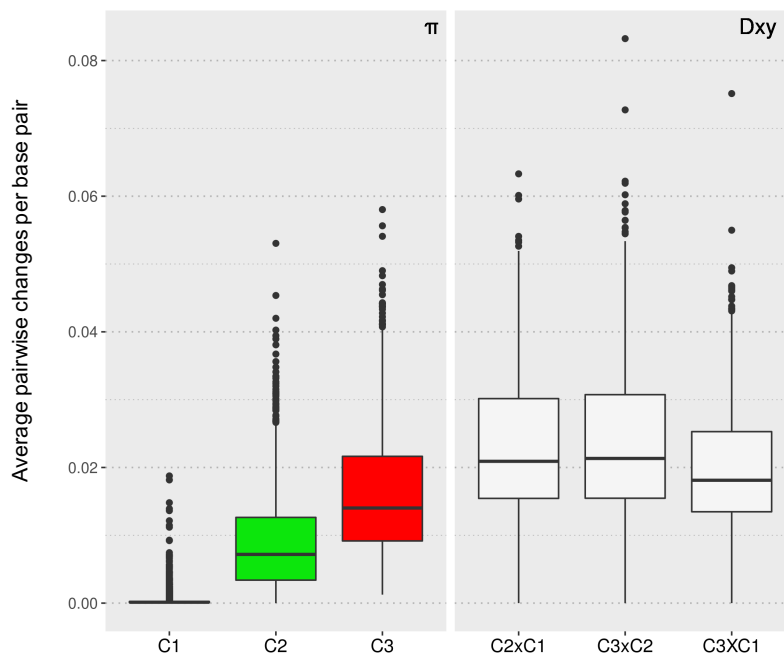

351

352 **Figure 2.** Box plots of the average populations pairwise nucleotide changes per site in  
 353 100-kb windows within (nucleotide diversity ( $\pi$ )) and between lineages ( $d_{xy}$ ).

354

355 **Footprints of recombination**

356           Recombination was analyzed in the ten largest contigs of each lineage, covering  
357 ~30% of the reference assembly. We detected a total of 375 recombined blocks using  
358 RDP4 software on the contigs analyzed, with stretches of nucleotide similarity across  
359 lineages distributed in a block-like structure (Table S2). Recombination rates  
360 differed significantly across lineages; based on the total of 375 recombination events,  
361 lineage C3 was found to have received the highest number of recombination events  
362 (n=203), followed by C2 (n=148), and with C1 receiving significantly fewer events  
363 (n=24) (Randomization test:  $p < 10^{-6}$ ; Table S2). In this analysis, we counted the number  
364 of cases in which C1, C2 or C3 was the recombinant in Table S2. Analyses of linkage  
365 disequilibrium showed that LD decayed to half of its maximum value in less than 1kb in  
366 lineages C2 and C3, while LD decay was markedly slower and more jagged in C1 (Fig.  
367 3). The large number of recombination events would have homogenized the nucleotide  
368 diversity and broken up any LD blocks in C2 and C3, resulting in a smooth LD decay. In  
369 contrast, the LD decay is more erratic in C1 because the few recombination events have  
370 not managed to break-up all LD blocks. Finally, the PHI test rejected the null hypothesis  
371 of clonality in all three lineages ( $P < 0.001$ ).

372



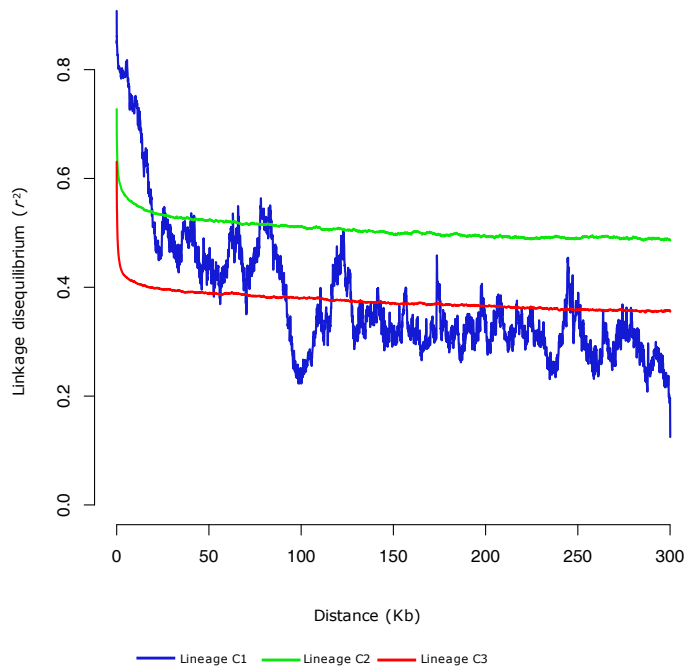

379 Probabilistic chromosome painting revealed genomic regions of shared ancestry

380 between lineages, with shared fragments of size longer than the longest contig in the

381 reference genome (2.37 Mb) (Fig. S4). Regions of shared ancestry were not strictly

382 restricted to the three isolates (LFN0318, LFN0217, and LFN0150) previously detected

383 by sNMF (Fig.1). For lineages C1 and C2, the majority of mutations were assigned to

384 self (i.e., to their cluster of origin), but in some contigs relatively large regions were

385 assigned to other lineages. In lineage C3, mutations tended to have non-zero membership

386 probabilities in multiple clusters. This implies that these polymorphisms are shared

387 across multiple lineages, probably reflecting the extremely high recombination rate

388 shown by this lineage. However, also in lineage C3, some regions were clearly assigned

389 to lineage C1 and self. For contig66, the isolate LFN0318 – a representative of lineage

390 C2 – shared high genetic similarity with lineage C3, consistent with many recent genetic  
391 exchanges between these lineages.

392 Further analyses using HYBRIDCHECK revealed a mosaic-like genome structure  
393 with well-defined blocks of high nucleotide similarity (Fig. S5). For contig66, relatively  
394 few short blocks of high similarity were detected between lineage C1 (using LFN0297  
395 as the representative isolate) and the two other lineages (spanning from 1.4 to 1.6 Mb),  
396 while large blocks were detected between lineage C2 and C3 (using LFN0318 and  
397 LFN0308 as the representative isolates, respectively) (Fig. 4). Assuming that the contigs  
398 analyzed are representative of the rest of the genome, the proportion of genome  
399 introgression between lineages varied markedly: 2.4% between C1 (LFN0297) and C2  
400 (LFN0318); 12.7% between C1 (LFN0297) and C3 (LFN0308); and 28.7% between C2  
401 (LFN0318), and C3 (LFN0308) (Table 3 and Table S3).

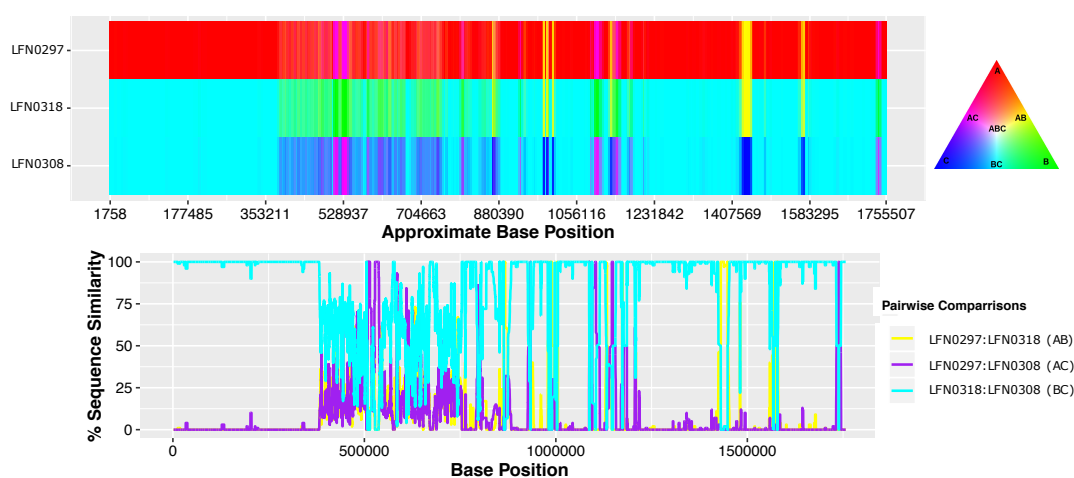

402

403 **Figure 4.** Scan for signature of genetic exchanges between *C. truncatum* lineages. The  
404 isolates LFN0297 (lineage C1), LFN0318 (lineage C2), and LFN0308 (lineage C3) were  
405 used as representative of each lineage. The sequence similarity along contig 66 among  
406 isolates visualized through RBG color triangular in the software HYBRIDCHECK. Areas  
407 where two sequences have the same color (yellow, purple or turquoise) are indicative of  
408 two lineages sharing the same polymorphisms. The bottom panel shows the linear plot  
409 of the proportion of SNPs shared between the three pairwise comparisons.

410 **Table 3.** Percentage of genetic introgression between lineages of *Colletotrichum*  
 411 *truncatum*

| Contig   | Pairwise lineages |         |         |
|----------|-------------------|---------|---------|
|          | C1 x C2           | C1 x C3 | C2 x C3 |
| tig55    | 2.70              | 13.56   | 11.17   |
| tig66    | 1.88              | 1.31    | 68.43   |
| tig97    | -                 | -       | 67.74   |
| tig164   | -                 | 36.00   | -       |
| tig209   | 1.99              | 20.08   | 6.74    |
| tig284   | -                 | 0.22    | 19.95   |
| tig332   | 4.38              | -       | 12.55   |
| tig526   | 0.03              | 1.19    | 78.54   |
| tig70486 | 4.03              | 16.16   | 3.66    |
| tig70488 | 0.22              | 2.23    | 11.87   |
| total    | 2.43              | 12.75   | 28.72   |

412

413 In order to discriminate between incomplete lineage sorting and hybridization  
 414 after secondary contact, we dated regions of high nucleotide identity between *C.*  
 415 *truncatum* lineages detected by HYBRIDCHECK. The age estimates of recombinant blocks  
 416 along the 10 largest contigs revealed recent introgression events. The most recent  
 417 hybridization event was dated back to 6,100 years before present, assuming a generation  
 418 time of one year (Table S4). Variation in the age of introgression events was however  
 419 extensive, most likely because of a lack of closest-related donors for all recombinant  
 420 regions detected (see Jouet, McMullan, & Van Oosterhout, 2015). The most recent events  
 421 were more likely to reflect ongoing genetic exchanges. The older events are more  
 422 consistent with incomplete lineage sorting, or alternatively, the coalescence time may not  
 423 accurately reflect the timing of genetic introgression because the “true” donors have not  
 424 been sampled.

425 In the introgression regions, we identified 357 genes between lineage C1  
 426 (LFN0297) and lineage C2 (LFN0318), 389 genes between lineage C1 (LFN0297) and  
 427 lineage C3 (LFN0308), and 584 genes between lineage C2 (LFN0318) and C3

428 (LFN0308). The introgressed regions include many secreted protein-encoding genes  
429 (between 38 and 62) (Table S5), including proteases and hydrolases which are known  
430 virulence-associated factors in pathogens (Monod et al., 2002; Soanes, Richards, &  
431 J.Talbot, 2007). However, these regions are not significantly enriched for those genes  
432 (binomial test  $p > 0.05$ ), and hence, we must conclude that genetic exchanges between  
433 these lineages are not more likely to involve genomic regions with virulence genes. Gene  
434 Ontology (GO) analysis revealed enrichment of GO terms between lineages, and these  
435 results are reported in Table S6.

436

### 437 **Demographic inferences**

438 To infer the demographic history of the three genetic lineages of *C. truncatum*,  
439 we compared three scenarios of isolation with or without migration for the four possible  
440 branching orders among lineages, using a diffusion approximation to the SFS  
441 implemented using DADI (We compared  $3 \times 4 = 12$  models compared in total). Note that  
442 in the context of the DADI analysis, the term “migration” is similar to “genetic  
443 introgression” in the recombination analysis. Likelihood ratio tests indicated that the  
444 model with trifurcating lineages (topology 1) and asymmetrical migration was the most  
445 supported (Fig. S6). These results corroborate our recombination analyses. To convert  
446 demographic parameter estimates to physical units, we estimated the ancestral population  
447 size ( $N_{AB1}$ ) (Fig.5). We used the population mutation rate  $\theta = 4N_{AB1}\mu L$ , where  $\mu$  was  
448 assumed to be approximately  $1e-8$  per generation (Lynch, 2010) and  $L$  was the genome  
449 size ( $\sim 55.1$  Mb). This ancestral population size was then used to transform time estimates  
450 from DADI (in units of  $2N_{AB1}$ ) into calendar years. Divergence was estimated to have  
451 initiated about 960,000 years ago, considering a generation time of a year. The lowest  
452 population size was estimated for lineage C1, consistent with a severe bottleneck

453 (nu1=2085 individuals), and/or the least input of genetic variation though recombination  
454 or genetic introgression. The migration rate was one order of magnitude higher between  
455 lineages C2 and C3 ( $m_{23}=2.25e-6$ ,  $m_{32}=1.80e-7$ ), than between lineages C1 and C3  
456 ( $m_{13}=1.05e-6$ ,  $m_{31}=0.43e-6$ ), and between lineages C1 and C2 ( $m_{12}=0.49e-6$ ,  
457  $m_{21}=0.37e-6$ ). Furthermore, the rate of migration into C1 ( $m_{21}$  and  $m_{31}$ ) was lower than  
458 in all other directions. These demographic analyses thus support the recombination and  
459 introgression analyses reported above.  
460

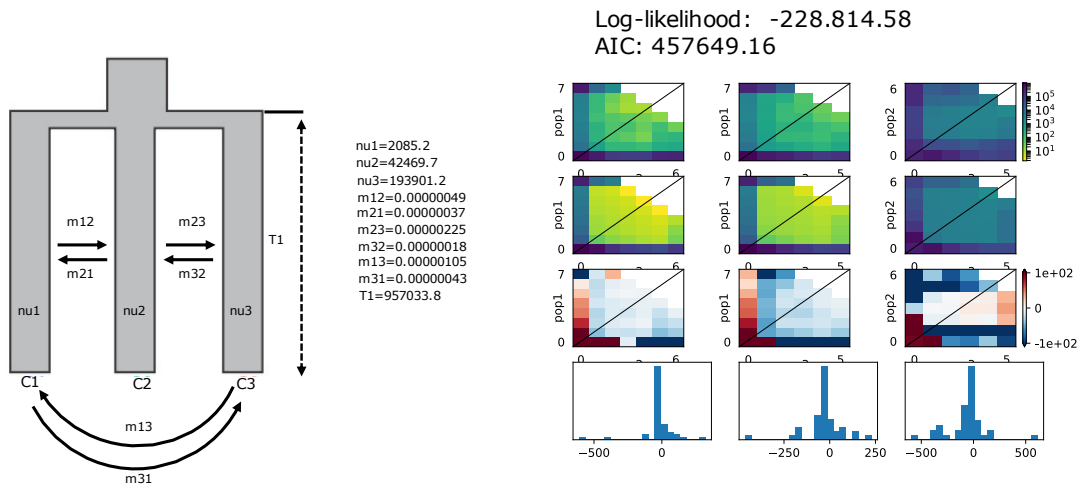

461

462

463 **Figure 5.** The best support demographic model (isolation with asymmetrical  
464 migration) using the three-dimensional site frequency spectrum (3D-SFS) between  
465 *Colletotrichum truncatum* lineages (C1, C2, and C3). The following parameters were  
466 estimated: nu1: size of C1 after split; nu2: size of C2 after split; nu3: size of C3 after  
467 split; m12: asymmetrical migration between C1 and C2; m21: asymmetrical migration  
468 between C2 and C1; m23: asymmetrical migration between C2 and C3; m32:  
469 asymmetrical migration between C3 and C2.; m13: asymmetrical migration between C1  
470 and C3; m31: asymmetrical migration between C3 and C1; T1: scaled time between the  
471 split and the size change (in units of  $2*N_a$  generations).

472

473

474

## 475 **Discussion**

476           The fungus *Colletotrichum truncatum* is an invasive pathogen on soybean crops  
477 in Brazil that causes severe yield losses. We used a population genomics approach to  
478 characterize the genetic makeup and infer the evolutionary history of *C. truncatum* using  
479 isolates representing two important regions of soybean production in Brazil. We showed  
480 that Brazilian *C. truncatum* is subdivided into three phylogenetically equidistant  
481 lineages. These lineages possess markedly different levels of standing genomic variation,  
482 which could reflect differences in the magnitude of bottlenecks associated with  
483 introduction events. A non-exclusive alternative hypothesis is that such differences have  
484 been caused by variation in the levels of recombination (i.e., genetic exchanges within a  
485 lineage) and/or genetic introgression (genetic exchanges between lineages). All our  
486 recombination analyses supported that the lineage C3 with the highest nucleotide  
487 diversity was most affected by such genetic exchanges, and that a larger number of these  
488 events also affected more genes. Conversely, C1 with the lowest nucleotide variation and  
489 the highest level of linkage disequilibrium was least affected by genetic exchanges.  
490 Furthermore, these conclusions are corroborated by our demographic analysis which  
491 showed that migration (or gene flow) into C1 (m21 and m31) is lower than into all other  
492 directions, and that migration into C3 was the highest. Next, we will discuss the  
493 evolutionary genomics of *C. truncatum*, the significance of the Brazilian bridgehead  
494 population, and the potential of fungal pathogens to evolve into invasive species.

495

### 496 ***Evolutionary genomics of C. truncatum***

497           Our clustering analyses supported the existence of three lineages, in agreement  
498 with the pattern of population subdivision previously detected based on multilocus  
499 microsatellite typing (Rogério, Gladieux, Massola, & Ciampi-Guillardi, 2019). These

500 phylogenetically equidistant lineages are characterized by markedly different levels of  
501 genetic standing variation. Genome-wide analyses of variability showed that lineage C1  
502 is largely clonal, reproductively more isolated, and genetically depauperate. Lineage C1  
503 was almost free from introgression, whilst between ~10 to 30% of assembled contigs of  
504 lineage C2 and C3 comprised recombinant (or introgressed) regions. The low level of  
505 genetic variation in C1 is consistent with the low number of recombinant blocks (only  
506 6.4%), but it can also indicate a more recent introduction into the country. It means that  
507 C1 lineage may simply not have had the opportunity to engage in many genetic  
508 exchanges yet. Such recent invasions could be associated with contaminated or infected  
509 soybean seeds imported from the U.S. during the 1960s and 1970s (Arantes and Miranda  
510 1993; Hirimoto and Vello 1986; Wysmierski and Vello 2013). Regions of low nucleotide  
511 diversity in this lineage corresponded with negative Tajima's D values, which is  
512 consistent with rapid population expansion after a recent founder event. These  
513 observations lend further support to our demographic inference of a recent invader, the  
514 limited amount of introgression, and the lower effective population size ( $N_e$ ) of C1  
515 lineage.

516 By contrast, lineage C3 showed a significantly higher level of genetic diversity,  
517 which may have been generated over time by genetic recombination and its much larger  
518  $N_e$  (Note that the large  $N_e$  estimate may simply be a consequence of the ample genetic  
519 variation that has introgressed into this lineage). This lineage may have already been  
520 present in Brazil, prior to the introduction of soybean. It is possible that this lineage may  
521 have been infecting other host species, such as lima bean and weeds, as proposed by  
522 earlier studies (Rogério, Gladieux, Massola, & Ciampi-Guillard, 2019; Tiffany &  
523 Gilman, 1954). If C3 was the first lineage that established itself, it would also have had  
524 more opportunity for recombination and genetic introgression than both other lineages,

525 which could have augmented its genetic diversity. Such monopoly effect may also have  
526 given this lineage a head-start, both in the co-evolutionary arms race with its host (Van  
527 Oosterhout, 2021), as well in the competition with other lineages.

528 We found evidence of a history of recombination both within and between  
529 lineages, applying a combination of integrated approaches. Fine-scale admixture  
530 mapping revealed that introgression occurred between the *C. truncatum* lineages  
531 coexisting in sympatry despite their relatively deep genomic divergence. The inference  
532 of individual ancestry coefficients using probabilistic chromosome painting detected  
533 large genomic regions of shared ancestry among the genetic lineages, suggesting  
534 relatively recent hybridization. History of recombination and genetic introgression was  
535 also supported by the analyzes with HYBRIDCHECK, which detected introgressed blocks  
536 that differed markedly in age. By estimating the coalescence time of introgressed regions,  
537 we found some events have occurred as recently as 6,100 years ago. This suggests that  
538 hybridization between *C. truncatum* lineages is a relatively recent - if not ongoing -  
539 process. In this analysis, we used a sexual generation time of a year, which is typical in  
540 plant pathogenic fungi from temperate areas. However, considering the climate  
541 conditions of Brazil, the generation time may be much shorter than one year, and hence,  
542 we may have overestimated the age of introgression events. Furthermore, it is unlikely  
543 we sampled the actual parental sequence, which would cause a further overestimation of  
544 the age. (When identifying the wrong parental sequence, the SNPs that differentiate the  
545 parent and the recipient sequence are assumed to have accumulated since recombination  
546 took place, erroneously placing the recombination event further in the past). In other  
547 words, hybridization events and genetic exchanges may be considerably more recent than  
548 our estimate. This is a potentially systematic bias typical for recombination studies, and  
549 this can be corrected for by broader (or more intense) sampling.



550           Although our analyses identified recent introgression between lineages, a  
551 substantial proportion of the shared ancestry observed between lineages appear to be  
552 caused by incomplete lineage sorting (or alternatively, we overestimated the age). In such  
553 cases, the recombination blocks pre-date the lineage divergence (Durand et al., 2011;  
554 McMullan et al., 2015), which implies that they are shared ancestral polymorphisms, or  
555 that the genetic exchanges occurred before the split of the lineages. *Colletotrichum*  
556 *truncatum* genomes therefore appear to be mosaics of distinct gene genealogies with  
557 markedly varied coalescence times. Alternatively, we may not have captured all extant  
558 lineages, which would have overestimated the introgression events. Future studies with  
559 a more comprehensive sampling may be able to shed further light on this. Next, we  
560 discuss our finding in the context of fungi as invasive species.

561

### 562 ***Evolutionary genomics of fungi as invasive species***

563           Fungal reproductive biology is conducive for genetic exchange, and such  
564 recombination events could both results from sexual reproduction or parasexual events  
565 via hyphal anastomosis. The latter mode has already been described for other  
566 *Colletotrichum* species (Roca, Davide, Mendes-Costa, & Wheals, 2003; Rosada et al.,  
567 2010; Souza-Paccola, Fávoro, Casela, & Paccola-Meirelles, 2003; Vaillancourt, Wang,  
568 Hanau, Rollins, & Du, 2000). Given that such genetic exchanges were found in all  
569 genomes – i.e., no pure genomes were found – introgression is likely to have augmented  
570 both the genetic diversity and the fitness of these hybrid genotypes. Therefore, we would  
571 conclude that adaptive introgression may have enhanced the evolutionary potential of *C.*  
572 *truncatum* during its invasion. However, when we tested this hypothesis, we did not find  
573 significant enrichment of secreted protein-encoding genes in the introgressed regions. In  
574 hindsight, this may not be surprising; in a coevolutionary arms race, genetic novelty at

575 single virulence gene introduced by recombination could provide a selective advantage  
576 that helps the recombinant lineage to establish itself (Van Oosterhout, 2021). Indeed,  
577 specific targets are likely to be under positive selection, rather than the total number of  
578 introgressed genes (Aguileta, Refrégier, Yockteng, Fournier, & Giraud, 2009). In other  
579 words, our study may not have discovered “the smoking gun”, but we have established  
580 “the means”, i.e., the large number of secreted protein-encoding genes that are exchanged  
581 during genetic introgression, which are possible co-evolutionary targets for selection.  
582 This implies that introgression can provide the genetic variation required in a host-  
583 parasite arms race.

584         The level of phylogenetic divergence among lineages, coupled with the  
585 demographic modeling carried out in this study, enables us to infer that the *C. truncatum*  
586 lineages significantly diversified before their joint introduction into Brazil. Based on the  
587 ancient signature of some of the recombination events, it is possible that genetic  
588 exchanges have occurred during the divergence process. These genetic exchanges would  
589 have prevented the accumulation of intrinsic postzygotic barriers, which underpin  
590 reproductive isolation in many recently diverged species (Bomblies et al., 2007; Lee et  
591 al., 2008; Masly & Presgraves, 2007). Another possibility is that they initially evolved in  
592 allopatry, but their later introduction in the same areas may have provided opportunities  
593 for secondary contact and hybridization, preventing the accumulation of postzygotic  
594 barriers. In summary, the absence of reproductive isolation may have provided ample  
595 evolutionary opportunities after secondary contact, allowing for hybridization between  
596 diverged lineages.

597         Introduced populations can overcome consequences of low genetic variation from  
598 founders, for instance, through the purging of deleterious alleles during bottlenecks  
599 events, and via the fixation of *de novo* beneficial mutations from standing variation

600 (Estoup et al., 2018; Frankham, 2005; Schrieber & Lachmuth, 2017). The genetic and  
601 environmental homogeneity found in soybean fields is thought to favor a huge census  
602 size of invasive fungal populations. Furthermore, without genetic diversity in the host,  
603 pathogens can rapidly spread and fix *de novo* evolved adaptations, overcoming new  
604 resistant varieties of crops and fungicides applications. Hybridization could be  
605 particularly important in this context because admixture could promote adaptation by  
606 rapidly creating novel allelic combinations (Hessenauer et al., 2020; McMullan et al.,  
607 2015; Nader et al., 2019). We propose that admixture has elevated the amount of  
608 genotypic variation generated by genetic introgression. In turn, this could have increased  
609 the amount of phenotypic variation due to transgressive segregation, providing novel  
610 substrate for natural selection (Nichols et al., 2015).

611 Bridgehead population may enhance the adapted invasive potential of species by  
612 enabling genetic exchanges between diverged lineages in the areas of first introduction.  
613 In this scenario, bridgehead populations may acquire new traits increasing the probability  
614 of successful establishment and further spread relative to native population (Bertelsmeier  
615 & Keller, 2018). We hypothesize that the admixture between *C. truncatum* lineages may  
616 lead to a bridgehead population, producing a highly adapted invasive population.  
617 Although the bridgehead effect has been proposed as a potential explanation for many  
618 successful biological invasions (Gau, Merz, Falloon, & Brunner, 2013; Leduc et al.,  
619 2015; van Boheemen et al., 2017) there is currently no clear empirical support for this  
620 hypothesis (but see Simon et al., 2011 for an example of an invasive fish species). To  
621 contain biological invasions, vigilance for invasive bridgehead populations is needed  
622 since they have the potential to generate new introductions (Bertelsmeier & Keller, 2018)  
623 and increase the adaptive evolutionary potential through genetic reassortment during  
624 hybridization.

625 Our study reinforces the practical applications of population genomics in preventing  
626 or curtailing, pathogen dissemination by supporting early interventions to limit economic  
627 damage (Stam et al., 2021). The Brazilian *C. truncatum* may represent a risk as a  
628 bridgehead for future invasions of soybean-producing areas. Our data highlights the  
629 inherent vulnerability of genetically uniform crops in the agro-ecological environment,  
630 particularly when faced with pathogens that can take full advantage of the opportunities  
631 offered by an increasingly globalized world. Some fungi have “The Means, Motive and  
632 Opportunity” to become invasive pathogens of crops. Many fungal pathogens possess the  
633 means in the form of a high propagule pressure through two modes of asexual  
634 reproduction, as well as the ability to rapidly generate novel genotypic variation,  
635 particularly through genetic introgression. Some fungi also have a motive, given the large  
636 biomass of genetically near-uniform crops that are their natural host plants. Few species  
637 also have the opportunity in the form of bridgehead populations that enable the genetic  
638 exchange that fuel the co-evolutionary arms race. Invasive crop pathogens, like *C.*  
639 *truncatum*, have “The Means, Motive and Opportunity” to pose the greatest risk to future  
640 food security. Population genomics can help identify pathogens that pose such risk,  
641 thereby helping to inform control strategies to better protect crops in the future.

642

### 643 **Acknowledgements**

644 The authors are grateful for the financial support given by São Paulo Research  
645 Foundation (FAPESP, Grand/Award Number:2017/09178-8), National Science and  
646 Technology Development Council (CNPq, Grand/Award Number: 153958/2016-2), and  
647 National Council for the Improvement of Higher Education (CAPES/PDSE,  
648 Grand/Award Number: 88881.133223/2016-01, PROEX/CAPES, Grand/Award  
649 Number: 330002037002P3).

650

651

## 652 **References**

- 653 Aguilera, G., Refrégier, G., Yockteng, R., Fournier, E., & Giraud, T. (2009). Rapidly  
654 evolving genes in pathogens: Methods for detecting positive selection and  
655 examples among fungi, bacteria, viruses and protists. *Infection, Genetics and*  
656 *Evolution*, 9(4), 656–670. doi: 10.1016/j.meegid.2009.03.010
- 657 Alexopoulos, C., Mims, C., & Blackwell, M. (1996). *Introductory Mycology*. New  
658 York: John Wiley and Sons.
- 659 Ali, S., Gladieux, P., Leconte, M., Gautier, A., Justesen, A. F., Hovmøller, M. S., ... de  
660 Vallavieille-Pope, C. (2014). Origin, Migration Routes and Worldwide Population  
661 Genetic Structure of the Wheat Yellow Rust Pathogen *Puccinia striiformis* f.sp.  
662 *tritici*. *PLoS Pathogens*, 10(1). doi: 10.1371/journal.ppat.1003903
- 663 Armenteros, J. J. A., Tsirigos, K. D., Sønderby, C. K., Petersen, T. N., Winther, O.,  
664 Brunak, S., ... Nielsen, H. (2019). SignalP 5.0 improves signal peptide predictions  
665 using deep neural networks. *Nature Biotechnology*, 37(4), 420–423. doi:  
666 10.1038/s41587-019-0036-z
- 667 Auton, A., & McVean, G. (2007). Recombination rate estimation in the presence of  
668 hotspots. *Genome Research*, 17, 1219–1227. doi: 10.1101/gr.6386707
- 669 Barton, N. (2010). Understanding adaptation in large populations. *PLoS Genetics*, 6(6),  
670 1–3. doi: 10.1371/journal.pgen.1000987
- 671 Bertelsmeier, C., & Keller, L. (2018). Bridgehead Effects and Role of Adaptive  
672 Evolution in Invasive Populations. *Trends in Ecology and Evolution*, 33(7), 527–  
673 534. doi: 10.1016/j.tree.2018.04.014
- 674 Bomblies, K., Lempe, J., Epple, P., Warthmann, N., Lanz, C., Dangl, J. L., & Weigel,  
675 D. (2007). Autoimmune response as a mechanism for a Dobzhansky-Muller-type  
676 incompatibility syndrome in plants. *PLoS Biology*, 5(9), 1962–1972. doi:  
677 10.1371/journal.pbio.0050236
- 678 Boni, M. F., Posada, D., & Feldman, M. W. (2007). An exact nonparametric method for  
679 inferring mosaic structure in sequence triplets. *Genetics*, 176(2), 1035–1047. doi:  
680 10.1534/genetics.106.068874
- 681 Bueno-Sancho, V., Persoons, A., Hubbard, A., Cabrera-Quio, L. E., Lewis, C. M.,  
682 Corredor-Moreno, P., ... Saunders, D. G. O. (2017). Pathogenomic Analysis of  
683 Wheat Yellow Rust Lineages Detects Seasonal Variation and Host Specificity.  
684 *Genome Biology and Evolution*, 9(12), 3282–3296. doi: 10.1093/gbe/evx241
- 685 Cannon, P. F., Damm, U., Johnston, P. R., & Weir, B. S. (2012). *Colletotrichum* -

- 686 current status and future directions. *Studies in Mycology*, 73, 181–213. doi:  
687 10.3114/sim0014
- 688 Conesa, A., Götz, S., García-Gómez, J. M., Terol, J., Talón, M., & Robles, M. (2005).  
689 Blast2GO: A universal tool for annotation, visualization and analysis in functional  
690 genomics research. *Bioinformatics*, 21(18), 3674–3676. doi:  
691 10.1093/bioinformatics/bti610
- 692 Connors, J., Krzywinski, M., Schein, J., Gascoyne, R., Horsman, D., Jones, S. J., &  
693 Marra, M. A. (2009). Circos : An information aesthetic for comparative genomics.  
694 *Genome Research*, 19(9), 1639–1645.
- 695 Damm, U., Woudenberg, J. H. C., Cannon, P. F., & Crous, P. W. (2009).  
696 *Colletotrichum* species with curved conidia from herbaceous hosts. *Fungal*  
697 *Diversity*, 39, 45–87.
- 698 De Jonge, R., Bolton, M. D., Kombrink, A., Van Den Berg, G. C. M., Yadeta, K. A., &  
699 Thomma, B. P. H. J. (2013). Extensive chromosomal reshuffling drives evolution  
700 of virulence in an asexual pathogen. *Genome Research*, 23(8), 1271–1282. doi:  
701 10.1101/gr.152660.112
- 702 Durand, E. Y., Patterson, N., Reich, D., & Slatkin, M. (2011). Testing for ancient  
703 admixture between closely related populations. *Molecular Biology and Evolution*,  
704 28(8), 2239–2252. doi: 10.1093/molbev/msr048
- 705 Dutech, C., Barrès, B., Bridier, J., Robin, C., Milgroom, M. G., & Ravigné, V. (2012).  
706 The chestnut blight fungus world tour: Successive introduction events from  
707 diverse origins in an invasive plant fungal pathogen. *Molecular Ecology*, 21(16),  
708 3931–3946. doi: 10.1111/j.1365-294X.2012.05575.x
- 709 Estoup, A., Ravign, V., Hufbauer, R., Vitalis, R., Gautier, M., & Facon, B. (2018). Is  
710 There A Genetic Paradox of Biological Invasion. *Annual Review of Ecology,*  
711 *Evolution, and Systematics*, 47, 51–72.
- 712 Fournier, E., Gladieux, P., & Giraud, T. (2013). The “Dr Jekyll and Mr Hyde fungus”:  
713 Noble rot versus gray mold symptoms of *Botrytis cinerea* on grapes. *Evolutionary*  
714 *Applications*, 6(6), 960–969. doi: 10.1111/eva.12079
- 715 Frankham, R. (2005). Resolving the genetic paradox in invasive species. *Heredity*,  
716 94(4), 385. doi: 10.1038/sj.hdy.6800634
- 717 Frichot, E., Mathieu, F., Trouillon, T., Bouchard, G., & François, O. (2014). Fast and  
718 Efficient Estimation of Individual Ancestry Coefficients. *Genetics*, 196(4), 973–  
719 983. doi: 10.1534/GENETICS.113.160572

- 720 Gau, R. D., Merz, U., Falloon, R. E., & Brunner, P. C. (2013). Global Genetics and  
721 Invasion History of the Potato Powdery Scab Pathogen, *Spongospora subterranea*  
722 f.sp. *subterranea*. *PLoS ONE*, 8(6). doi: 10.1371/journal.pone.0067944
- 723 Gibbs, M. J., Armstrong, J. S., & Gibbs, A. J. (2000). Sister-scanning: A Monte Carlo  
724 procedure for assessing signals in recombining sequences. *Bioinformatics*, 16(7),  
725 573–582. doi: 10.1093/bioinformatics/16.7.573
- 726 Gladieux, P., Feurtey, A., Hood, M. E., Snirc, A., Clavel, J., Dutech, C., ... Giraud, T.  
727 (2015). The population biology of fungal invasions. *Molecular Ecology*, 24(9),  
728 1969–1986. doi: 10.1111/mec.13028
- 729 Gladieux, Pierre, Ravel, S., Rieux, A., Cros-Arteil, S., Adreit, H., Milazzo, J., ...  
730 Tharreau, D. (2018). Coexistence of multiple endemic and pandemic lineages of  
731 the rice blast pathogen. *MBio*. doi: 10.1128/mBio.01806-17
- 732 Gladieux, Pierre, Ropars, J., Badouin, H., Branca, A., Aguilera, G., De Vienne, D. M.,  
733 ... Giraud, T. (2014). Fungal evolutionary genomics provides insight into the  
734 mechanisms of adaptive divergence in eukaryotes. *Molecular Ecology*, 23(4),  
735 753–773. doi: 10.1111/mec.12631
- 736 Grünwald, N. J., McDonald, B. A., & Milgroom, M. G. (2016). Population Genomics  
737 of Fungal and Oomycete Pathogens. *Annual Review of Phytopathology*, 54, 323–  
738 346. doi: 10.1146/annurev-phyto-080614-115913
- 739 Gutenkunst, R. N., Hernandez, R. D., Williamson, S. H., & Bustamante, C. D. (2009).  
740 Inferring the Joint Demographic History of Multiple Populations from  
741 Multidimensional SNP Frequency Data. *PLoS Genetics*, 5(10), e1000695.  
742 doi:10.1371/journal.pgen.1000695. doi: 10.1371/journal.pgen.1000695
- 743 Hartmann, F. E., McDonald, B. A., & Croll, D. (2018). Genome-wide evidence for  
744 divergent selection between populations of a major agricultural pathogen.  
745 *Molecular Ecology*, 2725–2741. doi: 10.1111/mec.14711
- 746 Hessenauer, P., Feau, N., Gill, U., Schwessinger, B., Brar, G. S., & Hamelin, R. C.  
747 (2020). Evolution and Adaptation of Forest and Crop Pathogens in the  
748 Anthropocene. *Phytopathology*. doi: 10.1094/phyto-08-20-0358-fi
- 749 Hill, W. G., & Robertson, A. (1968). Linkage disequilibrium in finite populations.  
750 *Theoretical and Applied Genetics*, 38(6), 226–231. doi: 10.1007/bf01245622
- 751 Hubbard, A., Lewis, C. M., Yoshida, K., Ramirez-Gonzalez, R. H., de Vallavieille-  
752 Pope, C., Thomas, J., ... Saunders, D. G. O. (2015). Field pathogenomics reveals  
753 the emergence of a diverse wheat yellow rust population. *Genome Biology*, 16(1),

- 754 1–15. doi: 10.1186/s13059-015-0590-8
- 755 Huson, D. H., & Bryant, D. (2006). Application of phylogenetic networks in  
756 evolutionary studies. *Molecular Biology and Evolution*, 23(2), 254–267. doi:  
757 10.1093/molbev/msj030
- 758 Hyde, K. ., Cai, L., McLenzie, E. H. C., Yang, Y. L., Zhang, J. Z., & Prihastuti, H.  
759 (2009). *Colletotrichum*: a catalogue of confusion. *Fungal Diversity*, 39, 1–17.
- 760 Jombart, T., & Ahmed, I. (2011). adegenet 1.3-1: New tools for the analysis of genome-  
761 wide SNP data. *Bioinformatics*, 27(21), 3070–3071. doi:  
762 10.1093/bioinformatics/btr521
- 763 Jouet, A., McMullan, M., & Van Oosterhout, C. (2015). The effects of recombination,  
764 mutation and selection on the evolution of the Rpl resistance genes in grasses.  
765 *Molecular Ecology*, 24(12), 3077–3092. doi: 10.1111/mec.13213
- 766 Latorre, S., Reyes-Avila, C. S., Malmgren, A., Win, J., Kamoun, S., & Burbano, H.  
767 (2020). Recently expanded clonal lineages of the rice blast fungus display distinct  
768 patterns of presence/absence of effector genes. *BMC Biology*, 1–15. doi:  
769 10.1101/2020.01.09.900308
- 770 Lawson, D. J., Hellenthal, G., Myers, S., & Falush, D. (2012). Inference of population  
771 structure using dense haplotype data. *PLoS Genetics*, 8(1), 11–17. doi:  
772 10.1371/journal.pgen.1002453
- 773 Leduc, A., Traoré, Y. N., Boyer, K., Magne, M., Grygiel, P., Juhasz, C. C., ... Pruvost,  
774 O. (2015). Bridgehead invasion of a monomorphic plant pathogenic bacterium:  
775 *Xanthomonas citri* pv. *citri*, an emerging citrus pathogen in Mali and Burkina  
776 Faso. *Environmental Microbiology*, 17(11), 4429–4442. doi: 10.1111/1462-  
777 2920.12876
- 778 Lee, H. Y., Chou, J. Y., Cheong, L., Chang, N. H., Yang, S. Y., & Leu, J. Y. (2008).  
779 Incompatibility of Nuclear and Mitochondrial Genomes Causes Hybrid Sterility  
780 between Two Yeast Species. *Cell*, 135(6), 1065–1073. doi:  
781 10.1016/j.cell.2008.10.047
- 782 Li, H., & Durbin, R. (2009). Fast and accurate short read alignment with Burrows-  
783 Wheeler transform. *Bioinformatics*, 25(14), 1754–1760. doi:  
784 10.1093/bioinformatics/btp324
- 785 Li, H., Handsaker, B., Wysoker, A., Fennell, T., Ruan, J., Homer, N., ... Durbin, R.  
786 (2009). The Sequence Alignment/Map format and SAMtools. *Bioinformatics*,  
787 25(16), 2078–2079. doi: 10.1093/bioinformatics/btp352



- 788 Lynch, M. (2010). Evolution of the mutation rate. *Trends in Genetics*, 26(8), 345–352.  
789 doi: 10.1016/j.tig.2010.05.003
- 790 Martin, D. P., Posada, D., Crandall, K. A., & Williamson, C. (2005). A modified  
791 bootscan algorithm for automated identification of recombinant sequences and  
792 recombination breakpoints. *AIDS Research and Human Retroviruses*, 21(1), 98–  
793 102. doi: 10.1089/aid.2005.21.98
- 794 Martin, D., & Rybicki, E. (2000). RDP: detection of recombination amongst aligned  
795 sequences. *Bioinformatics*. *Bioinformatics*, 16(6), 562–563. Retrieved from  
796 [www.uct.ac.za/](http://www.uct.ac.za/)
- 797 Martin, Darren P, Murrell, B., Golden, M., Khoosal, A., & Muhire, B. (2015). RDP4:  
798 Detection and analysis of recombination patterns in virus genomes. *Virus*  
799 *Evolution*, 1(1). doi: 10.1093/ve/vev003
- 800 Martin, M. (2011). Cutadapt Removes Adapter Sequences From High-Throughput  
801 Sequencing Reads. *EMBnet.Journal*, 17, 10–12. doi:  
802 <https://doi.org/10.14806/ej.17.1.200>
- 803 Masly, J. P., & Presgraves, D. C. (2007). High-resolution genome-wide dissection of  
804 the two rules of speciation in *Drosophila*. *PLoS Biology*, 5(9), 1890–1898. doi:  
805 10.1371/journal.pbio.0050243
- 806 McKenna, A., Hanna, M., Banks, E., Sivachenko, A., Cibulskis, K., Kernytsky, A., ...  
807 DePri, M. A. (2010). The Genome Analysis Toolkit: A MapReduce framework for  
808 analyzing next-generation DNA sequencing data. *Genome Research*, 20, 1297–  
809 1303. doi: 10.1101/gr.107524.110.20
- 810 McMullan, M., Gardiner, A., Bailey, K., Kemen, E., Ward, B. J., Cevik, V., ... Jones, J.  
811 D. G. (2015). Evidence for suppression of immunity as a driver for genomic  
812 introgressions and host range expansion in races of *Albugo candida*, a generalist  
813 parasite. *ELife*, 2015(4), 1–24. doi: 10.7554/eLife.04550
- 814 Miles A. Harding. (n.d.). Scikit-allel - Explore and analyse genetic variation. In., 1. 2.0  
815 edn. Retrieved from <https://github.com/cggh/scikit-allel>:
- 816 Monod, M., Capoccia, S., Léchenne, B., Zaugg, C., Holdom, M., & Jousson, O. (2002).  
817 Secreted proteases from pathogenic fungi. *International Journal of Medical*  
818 *Microbiology*, 292(5–6), 405–419. doi: 10.1078/1438-4221-00223
- 819 Nader, J. L., Mathers, T. C., Ward, B. J., Pachebat, J. A., Swain, M. T., Robinson, G.,  
820 ... Tyler, K. M. (2019). Evolutionary genomics of anthroponosis in  
821 *Cryptosporidium*. *Nature Microbiology*, [doi.org/10](https://doi.org/10.1038/s41564-019-). doi: 10.1038/s41564-019-

- 822 0377-x
- 823 Nichols, P., Genner, M. J., van Oosterhout, C., Smith, A., Parsons, P., Sungani, H., ...  
824 Joyce, D. A. (2015). Secondary contact seeds phenotypic novelty in cichlid fishes.  
825 *Proceedings of the Royal Society B: Biological Sciences*, 282(1798). doi:  
826 10.1098/rspb.2014.2272
- 827 Padidam, M., Sawyer, S., & Fauquet, C. M. (1999). Possible emergence of new  
828 geminiviruses by frequent recombination. *Virology*, 265(2), 218–225. doi:  
829 10.1006/viro.1999.0056
- 830 Parker, I. M., & Gilbert, G. S. (2018). Density-dependent disease, life-history trade-  
831 offs, and the effect of leaf pathogens on a suite of co-occurring close relatives.  
832 *Journal of Ecology*, 106(5), 1829–1838. doi: 10.1111/1365-2745.13024
- 833 Persoons, A., Hayden, K. J., Fabre, B., Frey, P., De Mita, S., Tellier, A., & Halkett, F.  
834 (2017). The escalatory Red Queen: Population extinction and replacement  
835 following arms race dynamics in poplar rust. *Molecular Ecology*, 26(7), 1902–  
836 1918. doi: 10.1111/mec.13980
- 837 Pertea, G., & Pertea, M. (2020). GFF Utilities: GffRead and GffCompare.  
838 *F1000Research*, 9. doi: 10.12688/f1000research.23297.2
- 839 Portik, D. M., Leaché, A. D., Rivera, D., Barej, M. F., Burger, M., Hirschfeld, M., ...  
840 Fujita, M. K. (2017). Evaluating mechanisms of diversification in a Guineo-  
841 Congolian tropical forest frog using demographic model selection. *Molecular*  
842 *Ecology*, 26(19), 5245–5263. doi: 10.1111/mec.14266
- 843 Posada, D., & Crandall, K. A. (2002). Evaluation of methods for detecting  
844 recombination from DNA sequences: Empirical data. *Molecular Biology and*  
845 *Evolution*, 19(5), 708–717. doi: 10.1093/oxfordjournals.molbev.a004129
- 846 Price, G. R. (1972). Fisher’s “fundamental theorem” made clear. *Annals of Human*  
847 *Genetics*, 36, 129–140.
- 848 Roca, M. G., Davide, L. C., Mendes-Costa, M. C., & Wheals, A. (2003). Conidial  
849 anastomosis tubes in *Colletotrichum*. *Fungal Genetics and Biology*, 40(2), 138–  
850 145. doi: 10.1016/S1087-1845(03)00088-4
- 851 Rogério, F., Bouffleur, T. R., Ciampi-Guillardi, M., Sukno, S. A., Thon, M. R., Massola,  
852 N. S., & Baroncelli, R. (2020). Genome sequence resources of *Colletotrichum*  
853 *truncatum*, *C. plurivorum*, *C. Musicola*, and *C. Sojae*: Four species pathogenic to  
854 soybean (*Glycine max*). *Phytopathology*, 110(9), 1497–1499. doi:  
855 10.1094/PHYTO-03-20-0102-A

- 856 Rogério, F., Gladieux, P., Massola, N. S., & Ciampi-Guillardi, M. (2019). Multiple  
857 Introductions Without Admixture of *Colletotrichum truncatum* Associated with  
858 Soybean Anthracnose in Brazil. *Phytopathology*, 109(49), 681–689. doi:  
859 10.1094/phyto-08-18-0321-r
- 860 Rosada, L. J., Franco, C. C. S., Sant’anna, J. R., Kaneshima, E. N., Gonçalves-Vidigal,  
861 M. C., & Castro-Prado, M. A. A. (2010). Parasexuality in Race 65 *Colletotrichum*  
862 *lindemuthianum* Isolates. *Journal of Eukaryotic*, 57(4), 383–384. doi:  
863 10.1111/j.1550-7408.2010.00486.x
- 864 Schrieber, K., & Lachmuth, S. (2017). The genetic paradox of invasions revisited: The  
865 potential role of inbreeding × environment interactions in invasion success.  
866 *Biological Reviews*, 92(2), 939–952. doi: 10.1111/brv.12263
- 867 Silva, D. N., Várzea, V., Paulo, O. S., & Batista, D. (2018). Population genomic  
868 footprints of host adaptation, introgression and recombination in coffee leaf rust.  
869 *Molecular Plant Pathology*, 19(7), 1742–1753. doi: 10.1111/mpp.12657
- 870 Simon, A., Britton, R., Gozlan, R., Van Oosterhout, C., Volckaert, F. A. M., &  
871 Hanfling, B. (2011). Invasive Cyprinid Fish in Europe Originate from the Single  
872 Introduction of an Admixed Source Population Followed by a Complex Pattern of  
873 Spread. *PLoS ONE*, 6(6), e18560. doi:10.1371/journal.pone.0018560. doi:  
874 10.1371/journal.pone.0018560
- 875 Smith, J. M. (1992). Analyzing the mosaic structure of genes. *Journal of Molecular*  
876 *Evolution*, 34(2), 126–129. doi: 10.1007/BF00182389
- 877 Soanes, D. M., Richards, T. A., & J. Talbot, N. (2007). Insights from Sequencing  
878 Fungal and Oomycete Genomes: What Can We Learn about Plant Disease and the  
879 Evolution of Pathogenicity? *The Plant Cell*, 19, 3318–3326. doi:  
880 10.1105/tpc.107.056663
- 881 Souza-Paccola, E. A., Fávoro, L. C. L., Casela, C. R., & Paccola-Meirelles, L. D.  
882 (2003). Genetic Recombination in *Colletotrichum sublineolum*. *Journal of*  
883 *Phytopathology*, 151(6), 329–334. doi: 10.1046/j.1439-0434.2003.00727.x
- 884 Stam, R., Gladieux, P., Vinatzer, B. A., Goss, E. M., Potnis, N., Candresse, T., &  
885 Brewer, M. T. (2021). Population Genomic- And phylogenomic-Enabled  
886 Advances to Increase Insight into Pathogen Biology and Epidemiology.  
887 *Phytopathology*, 111(1), 8–11. doi: 10.1094/PHYTO-11-20-0528-FI
- 888 Stauber, L., Badet, T., Prospero, S., & Croll, D. (2020). Emergence and diversification  
889 of a highly invasive chestnut pathogen lineage across south-eastern Europe.

- 890 *BioRxiv*. doi: 10.1101/2020.02.15.950170
- 891 Stukenbrock, E. H., & McDonald, B. A. (2008). The Origins of Plant Pathogens in  
892 Agro-Ecosystems. *Annual Review of Phytopathology*, 46, 75–100. doi:  
893 10.1146/annurev.phyto.010708.154114
- 894 Taylor, J., Jacobson, D., & Fisher, M. (1999). THE EVOLUTION OF A SEXUAL F  
895 UNGI : Reproduction, specification and classification. *Annual Review of*  
896 *Phytopathology*, 37, 197–246.
- 897 Thierry, M., Milazzo, J., Adreit, H., Ravel, S., Borron, S., Sella, V., ... Gladieux, P.  
898 (2020). Ecological Differentiation and Incipient Speciation in the Fungal Pathogen  
899 Causing Rice Blast. *BioRxiv*. doi: 10.1101/2020.06.02.129296
- 900 Thrall, P. H., Hochberg, M. E., Burdon, J. J., & Bever, J. D. (2007). Coevolution of  
901 symbiotic mutualists and parasites in a community context. *Trends in Ecology and*  
902 *Evolution*, 22(3), 120–126. doi: 10.1016/j.tree.2006.11.007
- 903 Thrall, P. H., Oakeshott, J. G., Fitt, G., Southerton, S., Burdon, J. J., Sheppard, A., ...  
904 Ford Denison, R. (2011). Evolution in agriculture: The application of evolutionary  
905 approaches to the management of biotic interactions in agro-ecosystems.  
906 *Evolutionary Applications*, 4(2), 200–215. doi: 10.1111/j.1752-4571.2010.00179.x
- 907 Tiffany, L., & Gilman, J. (1954). Species of *Colletotrichum* from Legumes. *Mycologia*,  
908 46(1), 52–75.
- 909 Vaillancourt, L., Wang, J., Hanau, R., Rollins, J., & Du, M. (2000). Genetic Analysis of  
910 Cross Fertility between Two Self-Sterile Strains of *Glomerella graminicola*.  
911 *Mycologia*, 92(3), 430. doi: 10.2307/3761501
- 912 van Boheemen, L. A., Lombaert, E., Nurkowski, K. A., Gauffre, B., Rieseberg, L. H.,  
913 & Hodgins, K. A. (2017). Multiple introductions, admixture and bridgehead  
914 invasion characterize the introduction history of *Ambrosia artemisiifolia* in Europe  
915 and Australia. *Molecular Ecology*, 26(20), 5421–5434. doi: 10.1111/mec.14293
- 916 Van Oosterhout, C. (2021). Mitigating the threat of emerging infectious diseases; a  
917 coevolutionary perspective. *Virulence*, 12(1), 1288–1295. doi:  
918 10.1080/21505594.2021.1920741
- 919 Vieira, A., Silva, D. N., Várzea, V., Paulo, O. S., & Batista, D. (2018). Novel insights  
920 on colonization routes and evolutionary potential of *Colletotrichum kahawae*, a  
921 severe pathogen of *Coffea arabica*. *Molecular Plant Pathology*, 19(11), 2488–  
922 2501. doi: 10.1111/mpp.12726
- 923 Ward, B. J., & van Oosterhout, C. (2016). HYBRIDCHECK: software for the rapid

924 detection, visualization and dating of recombinant regions in genome sequence  
925 data. *Molecular Ecology Resources*, 16(2), 534–539. doi: 10.1111/1755-  
926 0998.12469

927 Weidemann, G. J., TeBeest, D. O., & Cartwright, R. D. (1988). Host Specificity of  
928 *Colletotrichum gloeosporioides* f. sp. *aeschynomene* and *C. truncatum* in the  
929 Leguminosae. *Phytopathology*, 78, 986–990.

930 Zhang, C., Dong, S. S., Xu, J. Y., He, W. M., & Yang, T. L. (2019). PopLDdecay: A  
931 fast and effective tool for linkage disequilibrium decay analysis based on variant  
932 call format files. *Bioinformatics*, 35(10), 1786–1788. doi:  
933 10.1093/bioinformatics/bty875

934

### 935 **Data accessibility**

936 DNA sequences: Short Read Archive Accession in Table S1 (Supporting information)  
937

### 938 **Author Contributions**

939 M.C.G., and N.S.M.J conceived and designed the research; F.R., and M.C.G collected  
940 the samples; S.C.A. obtained genomic data; F.H.C., G.K.H., and G.R.A.M. performed  
941 genetic analysis; F.R., C.V.O., and P.G. analyzed the data and wrote the manuscript.  
942
